# Supplementary material for: Photoactive rolled-up TiO2microtubes: fabrication, characterization and applications
Source: Royal Society of Chemistry journal article supplement (doi:10.1039/c4tc00796d), 2014-01-01
Supplement: c4tc00796d1.pdf [file c4tc00796d1.pdf]

## Supporting Information

### Photoactive Rolled-up $\text{TiO}_2$ Microtubes: Fabrication, Characterization and Applications

*Silvia Giudicatti,<sup>1\*</sup> Sonja M. Marz,<sup>1</sup> Lluís Soler,<sup>1,2</sup> Abbas Madani,<sup>1</sup> Matthew R. Jorgensen,<sup>1</sup>*

*Samuel Sanchez,<sup>1,2\*</sup> and Oliver G. Schmidt,<sup>1,3</sup>*

<sup>1</sup> Institute for Integrative Nanosciences, IFW Dresden, Helmholtzstraße 20, 01069 Dresden, Germany

<sup>2</sup> Max Planck Institute for Intelligent Systems, Heisenbergstraße 3, 70569 Stuttgart, Germany

<sup>3</sup> Material Systems for Nanoelectronics, Chemnitz University of Technology, Reichenhainer Straße 70, 09107 Chemnitz, Germany

\* E-mail: s.giudicatti@ifw-dresden.de; sanchez@is.mpg.de

#### Supporting figures

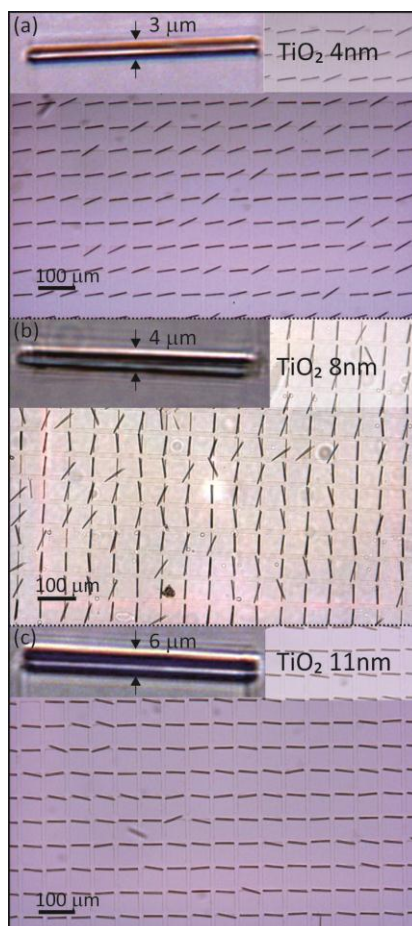

**Figure S1:** Optical images of arrays of rolled-up  $\text{TiO}_2$  tubes with different outer diameters according to different thickness of  $\text{TiO}_2$ : the diameter is 3  $\mu\text{m}$  in (a), 4  $\mu\text{m}$  in (b) and 6  $\mu\text{m}$  in (c). In all the cases, titania membranes deposited at room temperature were rolled using a photoresist sacrificial layer. Insets: zoomed view of a single tube of each array.

## Supporting videos

**SI Video 1:** Rolling up process of  $\text{TiO}_2$  nanomembranes (thickness 16 nm). Pattern  $50 \times 50 \mu\text{m}$ . The sacrificial photoresist layer is removed by immersing the glass wafers in dimethyl sulfoxide (DMSO). The  $\text{TiO}_2$  nanomembranes roll up immediately into microtubes of  $50 \mu\text{m}$  length and about  $10 \mu\text{m}$  in diameter.

**SI Video 2:** Motion of an active  $\text{TiO}_2$  tubular micromotor in sodium acetate-acetic acid buffer (HAc 4.79 M/NaAc 0.21 M at  $\text{pH}=3.6$ ) at room temperature ( $23^\circ\text{C}$ ) under UV light irradiation.
